# Supplementary material
Source: ML conference proceedings conference paper supplement (https://openreview.net/forum?id=rI5I07ePUq)
Supplement: supplementary_material [file attachment]

# MLP Embedded Inverse Tone Mapping

## Supplementary Material

Anonymous Authors

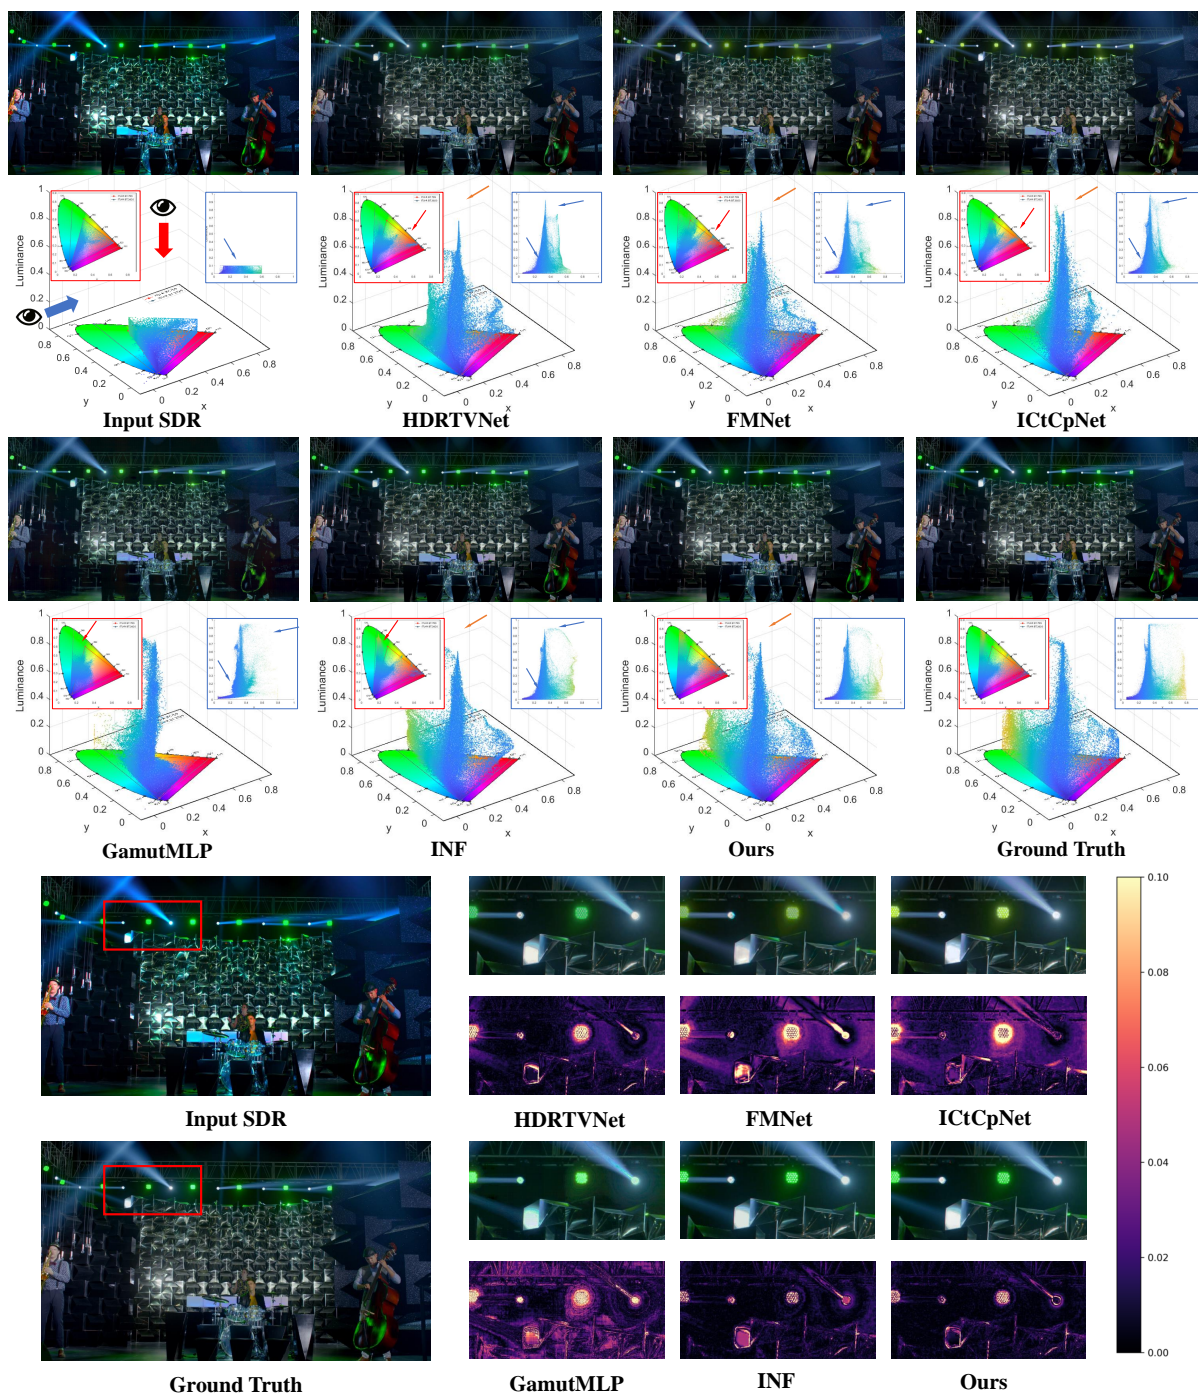

Figure 1: Additional qualitative comparisons in CIE xyY pixel distribution and error maps.

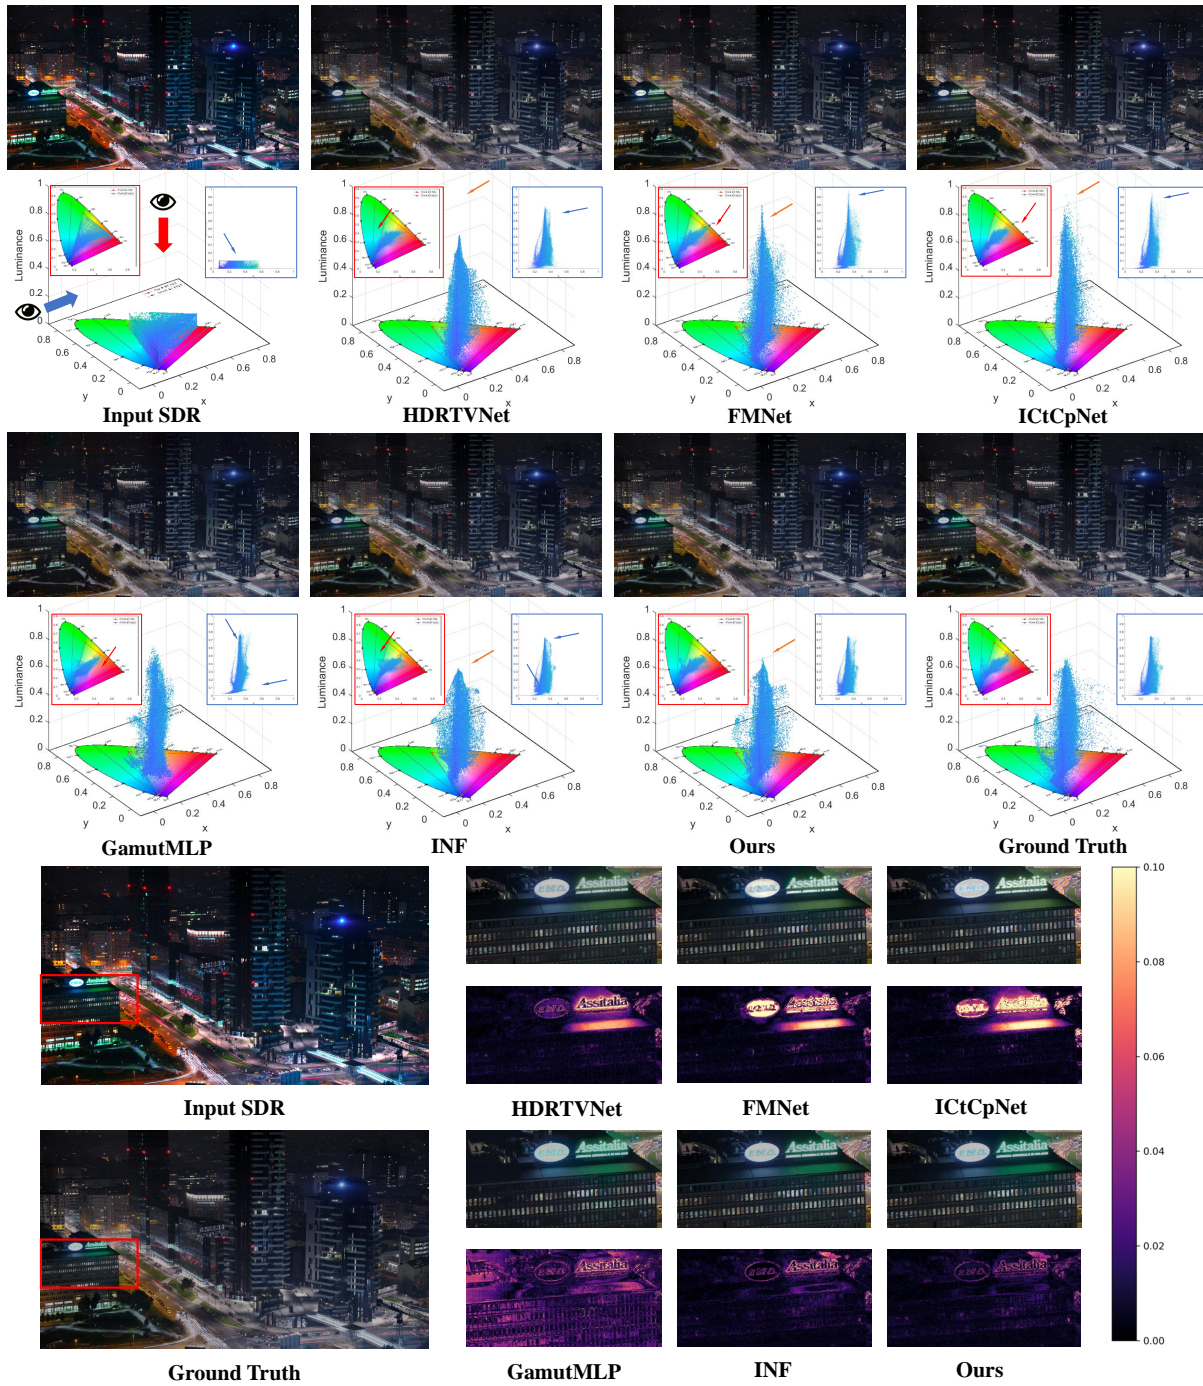

Figure 2: Additional qualitative comparisons in CIE xyY pixel distribution and error maps.
